# Supplementary material
Source: publisher figshare collection journal article supplement (https://adisjournals.figshare.com/ndownloader/files/34643315)
Supplement: Supplementary file 1 [file 34643315]

## Fosnetupitant more effective than fosaprepitant in preventing chemotherapy-induced nausea and vomiting for an extended duration: An exploratory analysis

Akito Hata, Yoshimasa Shiraishi, Naoki Inui, Morihito Okada, Masahiro Morise, Kohei Akiyoshi, Masayuki Takeda, Yasutaka Watanabe, Shunichi Sugawara, Naofumi Shinagawa, Kaoru Kubota, Toshiaki Saeki, Tomohide Tamura

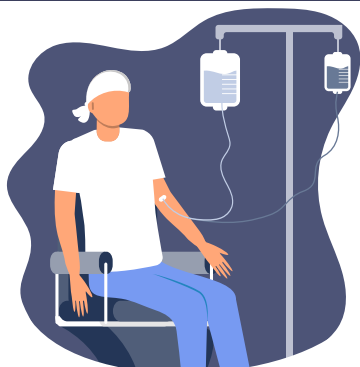

**CINV** can be detrimental to patients' quality of life

*And it can even disrupt their chemotherapy regimens*

Platinum-based therapies are known to cause CINV in **two phases**

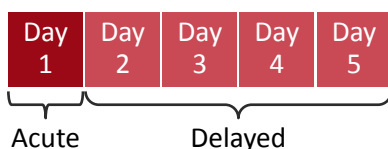

*But a substantial proportion of patients experience nausea beyond 5 days*

### Exploratory analysis of the CONSOLE study

#### CONSOLE Study

Fosnetupitant  
or  
Fosaprepitant

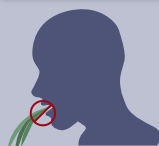

The first study to compare two NK<sub>1</sub> RA prophylactic antiemetic (i.e., antiemetic) regimens beyond 5 days

#### Patients

≥ 20 years old with solid tumors

New to chemotherapy or previously received chemotherapy with low emetic risk

Scheduled for **highly emetogenic cisplatin-based therapy** (≥70 mg/m<sup>2</sup>)

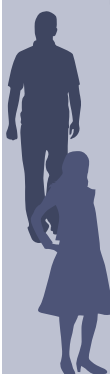

#### Test regimens

Fosnetupitant  
235 mg  
N=392

Fosaprepitant  
150 mg  
N=393

1

1

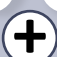

**Day 1** 0.75 mg Palonosetron  
9.9 mg Dexamethasone  
**Days 2-4** 6.6 mg Dexamethasone

The analysis examined **six distinct phases** post-chemotherapy and utilized a **LOCF** approach for missing values to evaluate **complete response** (no emetic event and no rescue medication)

#### Traditional time intervals

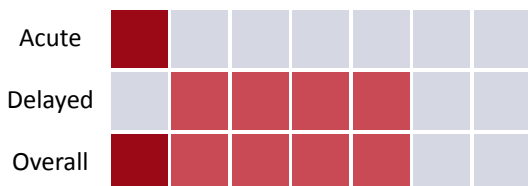

#### Complete response rate (%)

P value

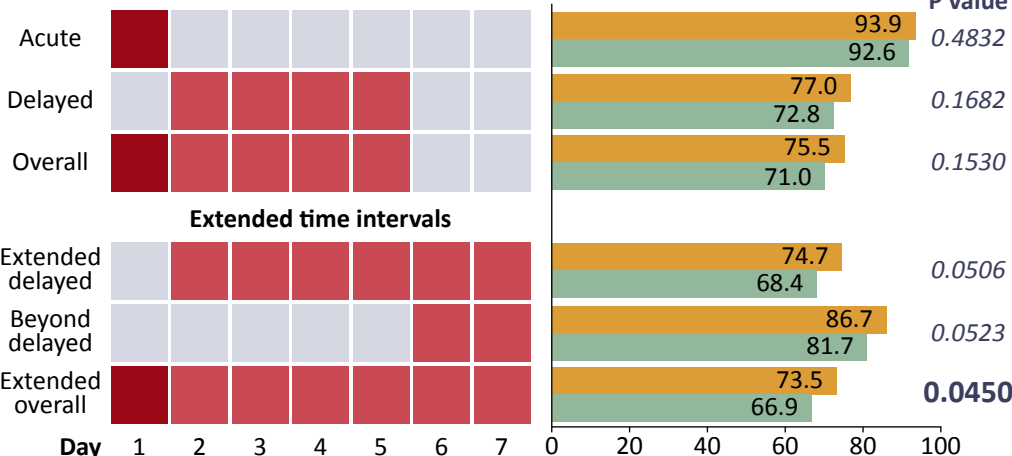

In this exploratory analysis, **fosnetupitant was significantly more effective** than fosaprepitant in preventing CINV during the extended 7-day period following cisplatin-based therapy

CINV chemotherapy-induced nausea and vomiting; NK<sub>1</sub> neurokinin-1; LOCF last observation carried forward; RA receptor antagonist
